# Supplementary material for: Basil functional and growth responses when cultivated via different aquaponic and hydroponics systems
Source: PeerJ. 2023 Jul 18;11:e15664. doi: 10.7717/peerj.15664 (PMC10361078; doi:10.7717/peerj.15664)
Supplement: Supplemental Information 1 [file peerj-11-15664-s001.xlsx]

## Sheet: Sheet1
	Photosynthesis																	PRI index												Chlorophyll a fluorescence parameters
	An				Tr				gs				WUE					PRI (Predawn)						PRI (Midday)						D30													D60
	D10	D25	D40	D55	D10	D25	D40	D55	D10	D25	D40	D55	D10	D25	D40	D55		D10	D17	D24	D30	D51	D60	D10	D17	D24	D30	D51	D60	Fv/Fm	φΕο	φRo	ψΕο	δRo	1-Vi	1/Vi	ABS/RC	TRo/RC	DIo/RC	PI total	PI abs	Sm	Fv/Fm	φΕο	φRo	ψΕο	δRo	1-Vi	1/Vi
HP	10.225	15.467	10.867	12.503	1.532	2.232	1.959	3.17	0.131	0.213	0.077	0.166	6.676	6.929	5.546	3.944	HP	0.04154	0.0128886	0.0409134	0.0134175	0.0517928	0.0365631	0.000951475	0.00623348	0.0228947	0.0148451	0.0190174	0.0251706	0.839	0.573	0.299	0.6834	0.5218	0.3566	1.55424	2.0021	1.6788	0.3233	6.1099	5.598	37.9905	0.834	0.5538	0.2654	0.6638	0.4792	0.3181	1.46649
HP	10.655	17.892	8.676	12.842	1.325	2.882	2.377	3.069	0.135	0.309	0.087	0.31	8.038	6.209	3.65	2.533	HP	0.0353179	0.0174825	0.0344828	0.0188341	0.0437637	0.0311027	0.0196464	0.0351053	0.0249355	0.0303665	0.0199013	0.0228	0.836	0.5984	0.3281	0.7155	0.5483	0.3923	1.64555	1.8382	1.5375	0.3007	8.4884	6.994	43.6936	0.838	0.5823	0.3233	0.6948	0.5551	0.3857	1.62787
HP	10.875	17.823	9.299	12.971	1.875	3.022	1.454	3.431	0.09	0.392	0.051	0.18	5.801	5.897	6.397	3.78	HP	0.0309395	0.0416667	0.0254	0.0174	0.0290163	0.0291	0.0124261	0.00623348	0.019697	0.0106952	0.0199013	0.0343643	0.832	0.5875	0.3306	0.7062	0.5627	0.3973	1.6592	2.0737	1.7252	0.3485	7.3817	5.737	38.3747	0.804	0.5308	0.3271	0.6603	0.6162	0.4069	1.68606
HP	11.047	18.884	11.259	13.272	0.985	2.525	1.181	2.43	0.137	0.295	0.219	0.099	11.219	7.48	2.693	5.462	HP	0.0219106	0.055102	0.0110759	0.0175	0.0336391	0.0349442	0.0137741	0.00614574	0.0152174	0.0158795	0.0122699	0.0110585	0.781	0.5246	0.3788	0.6718	0.7222	0.4851	1.94212	2.632	2.0553	0.5767	7.2023	2.771	67.0719	0.84	0.5233	0.3339	0.6229	0.6381	0.3975	1.65975
HP	10.469	18.249	10.388	13.511	1.013	2.004	3.664	1.732	0.103	0.219	0.16	0.069	10.338	9.105	2.836	7.802	HP	0.0235081	0.0112867	0.0315279	0.0142498	0.0478632	0.0323054	0.012	0.0085289	0.0117435	0.015873	0.020145	0.022365	0.841	0.6145	0.332	0.7308	0.5403	0.3949	1.65262	1.9383	1.6298	0.3085	8.6972	7.4	48.0977	0.84	0.5824	0.3339	0.6938	0.5733	0.3978	1.66058
HP	9.454	19.596	10.447	13.235	1.024	2.423	2.412	1.532	0.0986	0.255	0.096	0.072	9.235	8.087	4.33	6.64	HP	0.0396226	0.0230967	0.0188062	0.015165	0.0446735	0.0270812	0.0109336	0.012	0.0238908	0.012546	0.01069	0.00333333	0.82	0.5749	0.3739	0.7015	0.6503	0.4562	1.83891	2.2139	1.8143	0.3995	8.9654	4.82	57.6131	0.825	0.526	0.3032	0.6374	0.5763	0.3674	1.58078
HP	9.465	19.625	8.579	16.176	1.125	2.387	2.015	3.656	0.0912	0.236	0.081	0.116	8.41	8.222	4.257	4.425	HP	0.0350711	0.00978179	0.0154982	0.0224599	0.0412186	0.00967742	0.00813008	0.0195035	0.024735	0.00475867	0.0149516	0.000859845	0.838	0.5952	0.3216	0.7101	0.5403	0.3837	1.62259	1.9639	1.646	0.3179	7.5902	6.459	45.2847	0.843	0.5662	0.3012	0.6717	0.532	0.3573	1.55594
DCAP	12.707	17.864	13.836	14.052	0.861	2.908	2.567	2.517	0.067	0.341	0.066	0.121	14.765	5.798	8.832	5.583	HP	0.0220769	0.0311958	0.0221543	0.0160226	0.0447489	0.0264798	0.00429923	0.00623348	0.0215524	0.0116959	0.0126091	0.0146843	0.833	0.5821	0.2999	0.699	0.5153	0.3602	1.56299	2.2479	1.872	0.3759	5.4686	5.144	43.5821	0.842	0.594	0.3108	0.7056	0.5233	0.3692	1.58529
DCAP	11.932	17.565	13.43	15.674	0.952	2.66	2.974	2.277	0.067	0.312	0.112	0.082	12.538	5.852	4.517	6.885	HP	0.0268336	0.026738	0.0102489	0.0350584	0.0426357	0.0371681	0.00402414	0.0102158	0.0186986	0.0106952	0.016919	0.00352734	0.82	0.5653	0.335	0.6895	0.5925	0.4085	1.69062	2.3616	1.9365	0.4251	6.2258	4.282	46.9175	0.843	0.5821	0.3374	0.6904	0.5797	0.4002	1.66722
DCAP	11.931	17.001	11.838	16.036	0.902	2.941	2.916	2.43	0.08	0.324	0.2	0.187	13.225	5.78	2.408	4.675	HP	0.0347284	0.00963082	0.0466667	0.0367208	0.0378274	0.0404412	0.0244821	0.010118	0.0134146	0.0158795	0.019685	0.0203643	0.81	0.568	0.3675	0.7015	0.6471	0.4539	1.83117	2.5246	2.0443	0.4804	7.2628	3.961	56.5011	0.817	0.5169	0.3238	0.6326	0.6264	0.3963	1.65645
DCAP	12.329	18.728	12.938	14.354	0.9	3.076	2.301	2.965	0.086	0.336	0.093	0.129	13.694	6.089	5.621	4.842	HP	0.0309395	0.0146678	0.0348924	0.0295728	0.0349265	0.0156495	0.00263389	0.010215	0.012464	0.015873	0.00932994	0.0108803	0.835	0.598	0.3366	0.7159	0.563	0.4031	1.67532	2.0989	1.753	0.3459	7.8405	6.086	46.3017	0.842	0.5816	0.3063	0.6909	0.5267	0.3639	1.57208
DCAP	12.228	20.112	10.263	13.079	0.915	2.741	2.364	2.335	0.078	0.297	0.094	0.057	13.36	7.336	4.341	9.797	HP	0.0333333	0.0367647	0.040153	0.0175	0.0340459	0.0170871	0.0152027	0.00934579	0.0254609	0.0137931	0.0130354	0.019174	0.827	0.583	0.3432	0.7053	0.5887	0.4152	1.70999	2.1111	1.7451	0.366	7.7366	5.405	47.5624	0.827	0.544	0.3123	0.6582	0.574	0.3778	1.6072
DCAP	11.986	22.465	9.992	15.543	0.963	2.939	3.249	1.892	0.185	0.314	0.131	0.086	12.443	7.644	3.076	8.215	HP	0.0292177	0.026009	0.022674	0.0173	0.0287707	0.0367713	0.0290135	0.00934579	0.0343547	0.0137931	0.0281124	0.0319934	0.852	0.562	0.3169	0.6597	0.5639	0.372	1.59236	1.7706	1.5085	0.2621	8.1478	6.302	33.5937	0.869	0.5495	0.2735	0.632	0.4978	0.3146	1.459
DCAP	10.843	21.512	11.245	15.232	1.085	2.864	2.214	1.799	0.163	0.305	0.043	0.083	9.993	7.512	9.935	8.467	HP	0.032967	0.0126156	0.0145396	0.0130039	0.0359334	0.0416667	0.011257	0.010118	0.0243506	0.0167064	0.0323129	0.0203643	0.832	0.548	0.2765	0.6586	0.5046	0.3323	1.49768	2.0541	1.7092	0.3449	4.7404	4.655	33.131	0.849	0.5546	0.3378	0.6535	0.609	0.398	1.66113
CAP	10.094	15.578	10.688	11.285	1.176	2.761	2.636	3.767	0.081	0.309	0.104	0.258	11.585	5.641	4.305	2.368	HP	0.0244787	0.0156379	0.0141224	0.0116959	0.0310458	0.0292	0.0121	0.010118	0.0177515	0.00345423	0.0351053	0.0217391	0.81	0.4963	0.3247	0.6125	0.6543	0.4007	1.66861	2.4508	1.9858	0.465	5.2116	2.754	43.776	0.859	0.5504	0.3162	0.641	0.5746	0.3683	1.58303
CAP	10.858	15.399	10.169	14.603	1.085	2.967	1.047	4.391	0.076	0.389	0.041	0.329	10.011	5.19	9.71	2.708	HP	0.0278441	0.0123254	0.0257967	0.0112782	0.0360111	0.00491642	0.00983021	0.0292096	0.0329289	0.0149875	0.0102916	0.0161054	0.81	0.5451	0.3506	0.673	0.6431	0.4329	1.76336	2.1245	1.7207	0.4039	7.4402	4.128	51.1142	0.854	0.5525	0.3204	0.6472	0.58	0.3754	1.60102
CAP	13.831	14.909	7.737	10.109	0.953	2.742	1.831	3.889	0.071	0.32	0.065	0.172	14.511	4.708	4.225	2.6	HP	0.0328152	0.00222	0.0409357	0.00201748	0.0382696	0.0339761	0.0121	0.00934579	0.0305677	0.0120037	0.0215686	0.0152905	0.825	0.5859	0.3412	0.7098	0.5824	0.4134	1.70474	2.1494	1.7741	0.3753	7.5038	5.38	49.3216	0.839	0.5898	0.3168	0.7029	0.5371	0.3776	1.60668
CAP	15.808	14.674	7.981	12.631	0.896	3.207	2.199	2.976	0.07	0.448	0.177	0.16	13.634	4.576	4.901	4.244	HP	0.0247229	0.0184255	0.0105485	0.0150376	0.0245614	0.0371714	0.00963677	0.0135952	0.0242086	0.0356347	0.0172117	0.0203643	0.831	0.5898	0.3635	0.7095	0.6162	0.4372	1.77683	1.9515	1.6222	0.3293	9.9023	6.167	51.4843	0.818	0.5546	0.3159	0.6778	0.5696	0.3861	1.62893
CAP	16.54	18.444	9.031	15.216	0.8	3.016	1.394	3.622	0.044	0.374	0.053	0.108	13.666	6.448	6.477	5.802	HP	0.0323929	0.0149701	0.0132827	0.0125523	0.0363289	0.0266272	0.00587741	0.00183682	0.0215524	0.0147563	0.021483	0.02693	0.823	0.554	0.3362	0.6728	0.6069	0.4084	1.69033	2.3017	1.8953	0.4065	6.4328	4.166	45.9867	0.797	0.5285	0.3332	0.6634	0.6306	0.4184	1.71939
CAP	13.436	18.221	9.255	13.681	0.987	3.273	1.522	4.65	0.069	0.349	0.06	0.072	13.619	6.178	6.079	8.294	HP	0.0447761	0.0266299	0.0501672	0.00787402	0.0248307	0.0165893	0.0259516	0.010118	0.0215524	0.0139895	0.0303514	0.0330712	0.826	0.5733	0.3516	0.6943	0.6133	0.4258	1.74155	2.3032	1.9019	0.4014	7.4104	4.672	49.4931	0.847	0.5857	0.3299	0.6912	0.5633	0.3893	1.63747
CAP	13.493	19.374	10.215	11.812	0.993	2.955	1.407	4.362	0.068	0.296	0.016	0.201	13.586	6.894	5.105	2.708	HP	0.0283186	0.0308458	0.0176367	0.0124481	0.028436	0.03125	0.000855432	0.0351377	0.0290323	0.0203666	0.0288496	0.0304624	0.826	0.5596	0.3432	0.6776	0.6134	0.4156	1.71116	2.1569	1.7813	0.3756	7.3311	4.621	46.5043	0.791	0.5014	0.312	0.6336	0.6223	0.3943	1.65098
																	HP	0.0285261	0.00993125	0.0254	0.0181087	0.0374502	0.0421245	0.0226601	0.010118	0.0130321	0.00494234	0.0193115	0.0302521	0.789	0.5144	0.3363	0.652	0.6537	0.4262	1.74277	2.8325	2.2349	0.5975	4.6695	2.473	47.9253	0.831	0.5684	0.3084	0.6837	0.5426	0.371	1.58983
																	HP	0.0278261	0.0298211	0.0268075	0.0227498	0.0454936	0.0347376	0.00465839	0.00978979	0.0245524	0.0147563	0.0396476	0.0337942	0.832	0.572	0.3242	0.6876	0.5668	0.3897	1.63854	2.084	1.7336	0.3504	6.8355	5.225	43.7624	0.829	0.5757	0.3082	0.6947	0.5355	0.372	1.59236
																	HP	0.0328407	0.0236382	0.0155569	0.0195531	0.0277492	0.0269024	0.0257827	0.019984	0.0130112	0.0139895	0.0249307	0.0361446	0.812	0.5566	0.3596	0.6858	0.6461	0.4431	1.79565	2.3043	1.8702	0.4341	7.4507	4.081	49.1772	0.835	0.5951	0.3008	0.7123	0.5055	0.3601	1.56274
																	DCAP	0.0338346	0.0232143	0.0232158	0.0244	0.0467785	0.0158479	0.0273973	0.0085034	0.0193548	0.0285714	0.0161702	0.0238095	0.838	0.5834	0.347	0.6963	0.5947	0.4141	1.70678	1.9957	1.6721	0.3236	8.7114	5.937	47.6096	0.765	0.5008	0.373	0.6549	0.7449	0.4878	1.95236
																	DCAP	0.0252623	0.0208	0.0280224	0.023751	0.0279146	0.0160338	0.00755668	0.0278027	0.00769231	0.0266789	0.0201253	0.0199369	0.841	0.5916	0.3194	0.7038	0.5398	0.3799	1.61264	1.8453	1.5512	0.2942	7.9654	6.79	39.8936	0.846	0.4942	0.2729	0.584	0.5522	0.3225	1.47601
																	DCAP	0.0244698	0.0278293	0.0323129	0.0217554	0.0360288	0.0278	0.0136273	0.0172555	0.0168946	0.0120096	0.0145985	0.0196563	0.841	0.6039	0.3274	0.7182	0.5422	0.3894	1.63773	1.9219	1.616	0.3059	8.2983	7.008	42.9187	0.856	0.5552	0.2816	0.6488	0.5072	0.329	1.49031
																	DCAP	0.029347	0.0159884	0.0302067	0.0223084	0.030303	0.0331447	0.0095057	0.0221088	0.00729927	0.0132392	0.0211685	0.01956	0.846	0.5966	0.3419	0.7056	0.5731	0.4043	1.6787	1.8281	1.5457	0.2823	9.6327	7.177	46.5322	0.822	0.563	0.334	0.6852	0.5933	0.4065	1.68492
																	DCAP	0.0257827	0.0210697	0.024	0.0241	0.0338983	0.028396	0.0124896	0.0170124	0.0135635	0.0147059	0.0102767	0.0172117	0.839	0.6116	0.3454	0.7288	0.5647	0.4116	1.69952	1.8351	1.54	0.2951	9.9164	7.643	50.5032	0.836	0.5264	0.3134	0.6294	0.5953	0.3747	1.59923
																	DCAP	0.0224829	0.0232186	0.0224	0.037037	0.0267206	0.021978	0.0110092	0.0170124	0.0101801	0.0159744	0.0201253	0.00814212	0.836	0.557	0.2951	0.6663	0.5298	0.353	1.5456	2.1806	1.823	0.3576	5.258	4.667	42.5896	0.774	0.4856	0.3475	0.6274	0.7156	0.4489	1.81455
																	DCAP	0.0293103	0.0281577	0.0140105	0.0180361	0.0450281	0.0255009	0.0052356	0.0170124	0.0178117	0.0147059	0.0108527	0.0206897	0.832	0.5731	0.3158	0.6886	0.5511	0.3795	1.6116	2.0821	1.7328	0.3493	6.468	5.268	45.1449	0.855	0.6092	0.3849	0.7122	0.6319	0.4501	1.81851
																	DCAP	0.026973	0.0196078	0.0207407	0.0261324	0.0329861	0.0346535	0.0144648	0.0165563	0.0125786	0.0159744	0.00445236	0.0364641	0.817	0.5277	0.3104	0.6461	0.5882	0.3801	1.61316	2.5105	2.0506	0.46	4.631	3.242	42.8766	0.846	0.5656	0.28	0.6687	0.4949	0.331	1.49477
																	DCAP	0.0313653	0.0171756	0.0190404	0.0244287	0.031746	0.027027	0.00192308	0.0262726	0.015274	0.0276046	0.0280528	0.0275735	0.838	0.5991	0.3436	0.7148	0.5735	0.41	1.69492	1.956	1.6395	0.3165	8.9257	6.637	48.8591	0.852	0.5887	0.3039	0.691	0.5162	0.3568	1.55473
																	DCAP	0.0275067	0.0276134	0.0282589	0.0189983	0.0451389	0.0357454	0.00541516	0.0261026	0.0128205	0.0218465	0.0166113	0.0301003	0.821	0.547	0.3412	0.6663	0.6238	0.4156	1.71116	2.4897	2.0437	0.446	6.0937	3.675	46.1657	0.825	0.5229	0.2809	0.6337	0.5372	0.3404	1.51607
																	DCAP	0.0287984	0.0261026	0.0271739	0.0156682	0.0428305	0.0310263	0.0146915	0.0262726	0.0161418	0.0262443	0.0314465	0.0165854	0.842	0.62	0.3445	0.7366	0.5557	0.4093	1.69291	1.7523	1.475	0.2773	10.6134	8.487	49.1671	0.83	0.538	0.2974	0.6481	0.5528	0.3582	1.55812
																	DCAP	0.0330097	0.0247479	0.0214704	0.0185567	0.0490287	0.0243463	0.0314083	0.0260417	0.0162933	0.0343195	0.0277033	0.0165854	0.836	0.5794	0.3268	0.6929	0.564	0.3908	1.6415	2.187	1.8288	0.3582	6.8147	5.268	44.318	0.781	0.5002	0.2819	0.6406	0.5635	0.361	1.56495
																	DCAP	0.0262046	0.0176744	0.0220588	0.024	0.0295775	0.0281065	0.00727273	0.0164888	0.00815217	0.0298946	0.0283105	0.0107527	0.814	0.5163	0.3167	0.6343	0.6135	0.3892	1.6372	2.4089	1.9606	0.4483	4.9988	3.149	43.8527	0.825	0.5783	0.3361	0.7007	0.5812	0.4072	1.68691
																	DCAP	0.0318841	0.019943	0.0299517	0.0307845	0.0353982	0.0222222	0.0132392	0.0260417	0.01893	0.0368824	0.0115652	0.0165854	0.805	0.5131	0.3083	0.6377	0.6009	0.3832	1.62127	2.4235	1.9499	0.4736	4.5021	2.99	45.1129	0.837	0.5695	0.2842	0.6806	0.4991	0.3396	1.51423
																	DCAP	0.0365511	0.0192982	0.0311284	0.0239	0.0369733	0.027417	0.0175131	0.00786026	0.0161418	0.0256787	0.0191657	0.0165854	0.837	0.5682	0.3551	0.6789	0.6249	0.4243	1.73702	2.0015	1.6752	0.3263	9.0366	5.423	48.8543	0.716	0.3863	0.335	0.5393	0.8672	0.4677	1.87864
																	DCAP	0.0220197	0.0147874	0.0305181	0.0204082	0.0215427	0.0196344	0.0107349	0.0128	0.0161418	0.0274563	0.0135364	0.0199967	0.846	0.5772	0.332	0.6826	0.5751	0.3926	1.64636	1.7709	1.4974	0.2735	9.0018	6.651	44.1049	0.85	0.479	0.2501	0.5633	0.5221	0.2941	1.41663
																	DCAP	0.0365998	0.0201681	0.0241	0.0313514	0.0473186	0.0291	0.0126582	0.0272572	0.0265638	0.00804829	0.0220769	0.0207564	0.831	0.5892	0.327	0.7087	0.5549	0.3933	1.64826	2.184	1.8157	0.3683	6.8479	5.493	44.1238	0.811	0.5211	0.3251	0.6422	0.624	0.4008	1.66889
																	DCAP	0.0309278	0.0186092	0.0182724	0.011356	0.0331126	0.0431294	0.00676329	0.00490998	0.0404218	0.0295623	0.0333651	0.0231201	0.793	0.5176	0.3452	0.6525	0.667	0.4352	1.77054	2.6545	2.1056	0.5489	5.4351	2.714	52.5309	0.825	0.5509	0.2872	0.6678	0.5213	0.3481	1.53398
																	DCAP	0.0346051	0.0210046	0.0171116	0.0192113	0.0495868	0.0396825	0.028169	0.00910747	0.015625	0.00924974	0.0153846	0.0199967	0.816	0.5487	0.3468	0.6722	0.6319	0.4248	1.73853	2.318	1.8922	0.4259	6.7492	3.931	46.8102	0.837	0.5586	0.2808	0.667	0.5028	0.3354	1.50466
																	DCAP	0.0279605	0.0225141	0.0361446	0.0337302	0.0310663	0.0140187	0.00878049	0.0227451	0.0210697	0.0293542	0.0340999	0.0170455	0.842	0.6122	0.3503	0.7272	0.5722	0.4161	1.71262	1.8065	1.5208	0.2857	10.507	7.854	51.7213	0.846	0.6057	0.3283	0.7158	0.542	0.3879	1.63372
																	DCAP	0.0413793	0.015873	0.0101351	0.0251346	0.0391265	0.039801	0.0141	0.0170497	0.00740741	0.0215562	0.0223695	0.0199967	0.81	0.5499	0.3314	0.6786	0.6027	0.409	1.69205	2.2627	1.8335	0.4292	6.048	3.986	45.2736	0.833	0.593	0.3054	0.7118	0.5151	0.3666	1.57878
																	DCAP	0.0280778	0.0166799	0.0288925	0.0260521	0.0385852	0.018315	0.0226601	0.00453309	0.0162418	0.0270677	0.0144462	0.0345357	0.805	0.5158	0.3475	0.6407	0.6737	0.4316	1.75932	2.5559	2.0579	0.4981	5.9504	2.882	51.1775	0.81	0.5376	0.3161	0.6635	0.5879	0.3901	1.63961
																	DCAP	0.029347	0.0159858	0.0117994	0.0273438	0.0222222	0.0269854	0.00465839	0.0339559	0.0112867	0.0113422	0.0201253	0.0199967	0.826	0.5666	0.3224	0.6862	0.569	0.3905	1.64069	2.2265	1.8385	0.388	6.1438	4.654	42.9652	0.829	0.5827	0.3089	0.7025	0.5301	0.3724	1.59337
																	DCAP	0.0206278	0.0207	0.0245184	0.0368932	0.0561122	0.0385965	0.0257827	0.00497512	0.0302594	0.0102605	0.0269784	0.0199967	0.83	0.5855	0.3511	0.7051	0.5997	0.4229	1.7328	2.1727	1.8041	0.3685	8.0717	5.387	46.4732	0.827	0.536	0.2861	0.6481	0.5338	0.346	1.52905
																	CAP	0.0222905	0.0212072	0.02	0.0314658	0.0283401	0.0133673	-0.00287275	-0.00541516	-0.0093633	0.0160846	0.0121906	0.0111643	0.839	0.5991	0.3272	0.7139	0.5461	0.3899	1.63908	1.8191	1.5266	0.2926	8.6139	7.159	42.9003	0.844	0.5722	0.2575	0.6778	0.4501	0.3051	1.43906
																	CAP	0.011544	0.0173847	0.018096	0.0111821	0.0215558	0.0174	-0.00287275	0.0209372	0.00778456	0.0210896	0.00978793	0.0204762	0.836	0.5575	0.34	0.6669	0.61	0.4068	1.68577	2.1635	1.8085	0.355	7.3726	4.714	42.8566	0.851	0.5214	0.2732	0.6124	0.524	0.3209	1.47254
																	CAP	0.0318021	0.0123119	0.0224813	0.030623	0.0425056	0.0289474	-0.014827	-0.0112	0.00429185	0.0107172	0.023569	0.0186916	0.833	0.5539	0.3562	0.6648	0.6432	0.4276	1.74703	2.326	1.9377	0.3883	7.6727	4.256	43.1588	0.83	0.5266	0.2644	0.6348	0.502	0.3187	1.46778
																	CAP	0.0161074	0.010929	0.0217391	0.030623	0.0386196	0.0207756	-0.00387297	-0.0130069	0.00996264	0.0175439	0.0152801	0.0214656	0.83	0.5479	0.2902	0.66	0.5297	0.3496	1.53752	2.112	1.7535	0.3585	5.0629	4.495	36.7538	0.802	0.443	0.2447	0.5524	0.5524	0.3051	1.43906
																	CAP	0.0253061	0.00905923	0.0392344	0.0219	0.0393701	0.0038525	-0.003367	-0.0106134	0.000989456	0.0238582	0.0232089	0.0108844	0.826	0.5787	0.3059	0.7002	0.5286	0.3701	1.58755	2.2452	1.8556	0.3896	5.5556	4.955	41.9122	0.799	0.4842	0.2592	0.6061	0.5353	0.3245	1.48038
																	CAP	0.0196531	0.0174793	0.0219	0.0141474	0.0378549	0.0286145	-0.00537222	-0.0157332	0.00698947	0.0210896	0.0110906	0.0279929	0.838	0.5788	0.3393	0.6905	0.5861	0.4047	1.67983	2.2131	1.8553	0.3578	7.4007	5.226	45.9938	0.829	0.5612	0.2967	0.6768	0.5287	0.3578	1.55715
																	CAP	0.0196531	0.0311111	0.0112697	0.0324374	0.0310192	0.00778816	-0.00644183	-0.0216826	-0.00227445	0.0107172	0.0110906	0.0168789	0.823	0.5483	0.2977	0.6664	0.543	0.3619	1.56715	2.3781	1.9565	0.4216	4.633	3.899	39.8422	0.753	0.4585	0.3241	0.6091	0.7068	0.4305	1.75593
																	CAP	0.0166389	0.0148322	0.0343137	0.0105434	0.0342262	0.0179469	-0.00387297	-0.0106134	0.0106762	0.0175439	0.0110906	0.0113409	0.826	0.5682	0.3015	0.6875	0.5306	0.3648	1.57431	2.5015	2.0673	0.4342	4.733	4.187	39.315	0.833	0.5617	0.2758	0.6741	0.491	0.331	1.49477
																	CAP	0.0186457	0.00459137	0.0169972	0.0139276	0.03517	0.029985	-0.00780031	-0.029889	0.00689655	0.0238582	0.0030349	0.0105133	0.835	0.5734	0.3532	0.6869	0.616	0.4231	1.7334	2.3758	1.9832	0.3926	7.4833	4.665	43.4894	0.824	0.5465	0.3069	0.6631	0.5615	0.3723	1.59312
																	CAP	0.0268336	0.0214286	0.0203785	0.013899	0.0214395	0.0119048	-0.0017452	-0.0179153	0.00689655	0.0160846	0.0152778	0.0168789	0.83	0.5693	0.3374	0.6856	0.5926	0.4063	1.68435	2.4509	2.0351	0.4157	6.3359	4.356	41.7367	0.769	0.4907	0.3088	0.6384	0.6293	0.4018	1.67168
																	CAP	0.0245614	0.0165289	0.0217077	0.01059	0.0329475	0.02	-0.00689655	-0.0106134	0.00614439	0.00616861	0.0118519	0.0168789	0.824	0.5569	0.3574	0.6755	0.6417	0.4335	1.76523	2.3806	1.9628	0.4178	7.3561	4.108	48.6161	0.814	0.5194	0.2568	0.6377	0.4944	0.3153	1.46049
																	CAP	0.019216	0.00623053	0.0283843	0.0134328	0.0237581	0.0290163	-0.00387297	-0.0152217	0.00621361	0.0160846	0.00978793	0.0168789	0.824	0.5662	0.339	0.6871	0.5989	0.4115	1.69924	2.2984	1.8939	0.4046	6.6766	4.472	44.7174	0.796	0.4894	0.252	0.6152	0.5149	0.3167	1.46349
																	CAP	0.0196531	0.00462963	0.0267686	0.0218	0.0297723	0.0365556	0.00679245	-0.0263356	0.019024	0.0159876	0.0209677	0.00782473	0.81	0.5165	0.2626	0.6379	0.5084	0.3243	1.47995	2.3868	1.9325	0.4543	3.2471	3.14	28.3788	0.782	0.3409	0.1781	0.436	0.5226	0.2278	1.295
																	CAP	0.0124777	0.0190114	0.0224475	0.0219561	0.0271941	0.0087073	-0.00387297	-0.0115702	0.00952381	0.0174184	0.01785	0.0149961	0.826	0.5341	0.3071	0.6467	0.5749	0.3718	1.59185	2.143	1.77	0.3729	5.4825	4.054	39.2344	0.835	0.4227	0.2022	0.506	0.4784	0.2421	1.31944
																	CAP	0.0158491	0.00931677	0.00809419	0.0202177	0.0254042	0.0175	-0.00506146	-0.00940975	0.00408719	0.0186706	0.00198807	0.017776	0.84	0.5665	0.2749	0.6746	0.4852	0.3273	1.48655	1.8964	1.5925	0.3039	5.3987	5.728	35.1537	0.849	0.4923	0.2145	0.5799	0.4358	0.2527	1.33815
																	CAP	0.0196531	0.0153	0.0122649	0.0307018	0.0417551	0.0175	-0.00504686	-0.0106134	0.0170068	0.0252951	0.0188088	0.0149961	0.843	0.5482	0.2992	0.6504	0.5459	0.3551	1.55063	2.1803	1.8375	0.3428	5.4986	4.574	36.9783	0.836	0.4899	0.3009	0.5857	0.6143	0.3598	1.56201
																	CAP	0.0191507	0.0201005	0.013209	0.0308285	0.0208	0.0255591	0.00679245	-0.00243704	0.00612423	0.0229885	0.0291411	0.0180879	0.83	0.5879	0.3493	0.7083	0.5941	0.4208	1.72652	1.9603	1.627	0.3333	8.852	6.047	46.8958	0.837	0.5586	0.2808	0.667	0.5028	0.3354	1.50466
																	CAP	0.0196531	0.0131148	0.0164	0.0225269	0.0248307	0.0183	0.00152672	-0.00340136	0.0161812	0.00459137	0.0161812	0.0149961	0.808	0.5337	0.276	0.6606	0.5172	0.3417	1.51906	2.6521	2.1424	0.5097	3.3054	3.085	40.6151	0.846	0.6057	0.3283	0.7158	0.542	0.3879	1.63372
																	CAP	0.0227273	0.0152	0.0156006	0.0251955	0.0422311	0.0191	-0.00624442	-0.0106134	0.0101196	0.0164656	0.015956	0.016666	0.829	0.5753	0.3512	0.6938	0.6105	0.4235	1.73461	2.1555	1.7873	0.3682	7.9968	5.103	48.8014	0.817	0.5611	0.2791	0.6866	0.4974	0.3415	1.5186
																	CAP	0.0118467	0.0151	0.0093	0.0251955	0.0237548	0.0183	-0.00299	-0.0114943	-0.00576132	0.0125225	0.0225141	0.00762195	0.832	0.5779	0.2892	0.6948	0.5005	0.3477	1.53304	2.4514	2.0389	0.4125	4.5986	4.59	38.6951	0.826	0.5309	0.2296	0.6429	0.4325	0.2781	1.38523
																	CAP	0.0172144	0.0221857	0.0177805	0.0245232	0.0305958	0.0110497	-0.00624442	-0.0106134	-0.00344828	0.0146341	0.0169562	0.018654	0.82	0.5614	0.3679	0.6844	0.6554	0.4485	1.81324	2.2787	1.8692	0.4094	8.2613	4.344	52.6581	0.834	0.5698	0.3013	0.6834	0.5287	0.3613	1.56568
																	CAP	0.0122807	0.0209924	0.033557	0.014791	0.0460594	0.00802139	0.00840336	-0.00754401	0.00664361	0.0131148	0.00988793	0.019802	0.837	0.6071	0.3767	0.7252	0.6205	0.45	1.81818	2.0294	1.699	0.3304	10.9315	6.685	48.9945	0.824	0.5695	0.2939	0.6915	0.5161	0.3569	1.55497
																	CAP	0.0240964	0.0154	0.0387755	0.0307971	0.0206986	0.0187829	0.00313972	-0.0106134	0.0247406	0.0199587	0.0168456	0.0149961	0.836	0.5898	0.3482	0.7055	0.5904	0.4165	1.7138	2.0601	1.7223	0.3378	8.5457	5.928	43.4692	0.82	0.5306	0.2496	0.647	0.4704	0.3043	1.4374
																	CAP	0.0248199	0.014218	0.035225	0.0213	0.0271647	0.0277008	0.000849618	0.00140056	-0.00575185	0.0168465	0.0172117	0.0345455	0.815	0.5544	0.3017	0.6805	0.5442	0.3703	1.58806	2.3658	1.9276	0.4382	4.7273	3.96	37.6677	0.833	0.5615	0.2453	0.6742	0.4368	0.2945	1.41743
[truncated: 77 more columns]
